# Supplementary material for: Mapping the Biotransformation of Coumarins through Filamentous Fungi
Source: MDPI journal article supplement (doi:10.3390/molecules24193531), 2019-09-29
Supplement: s1 [file s1]

## **Supplementary data**

### **Mapping the biotransformation of coumarins by filamentous fungi**

Jainara Santos do Nascimento<sup>1</sup>, Wilson Elias Rozo Núñez<sup>1</sup>, Valmore Henrique Pereira dos Santos<sup>1</sup>, Josefina Aleu<sup>2</sup>, Sílvia Cunha<sup>1</sup>, Eliane de Oliveira Silva<sup>1,\*</sup>

<sup>1</sup>Organic Chemistry Department, Chemistry Institute, Federal University of Bahia, 40170-115 Salvador, Bahia, Brazil

<sup>2</sup>Organic Chemistry Department, Faculty of Sciences, University of Cádiz, 11510 Puerto Real, Cádiz, Spain

\*Corresponding author at: Organic Chemistry Department, Chemistry Institute, Federal University of Bahia, Barão de Jeremoabo 147, Salvador 40170-115, Bahia, Brazil.

E-mail address: elianeos@ufba.br Telephone number: +55 71 32836893

ORCID number: 0000-0001-9121-0481

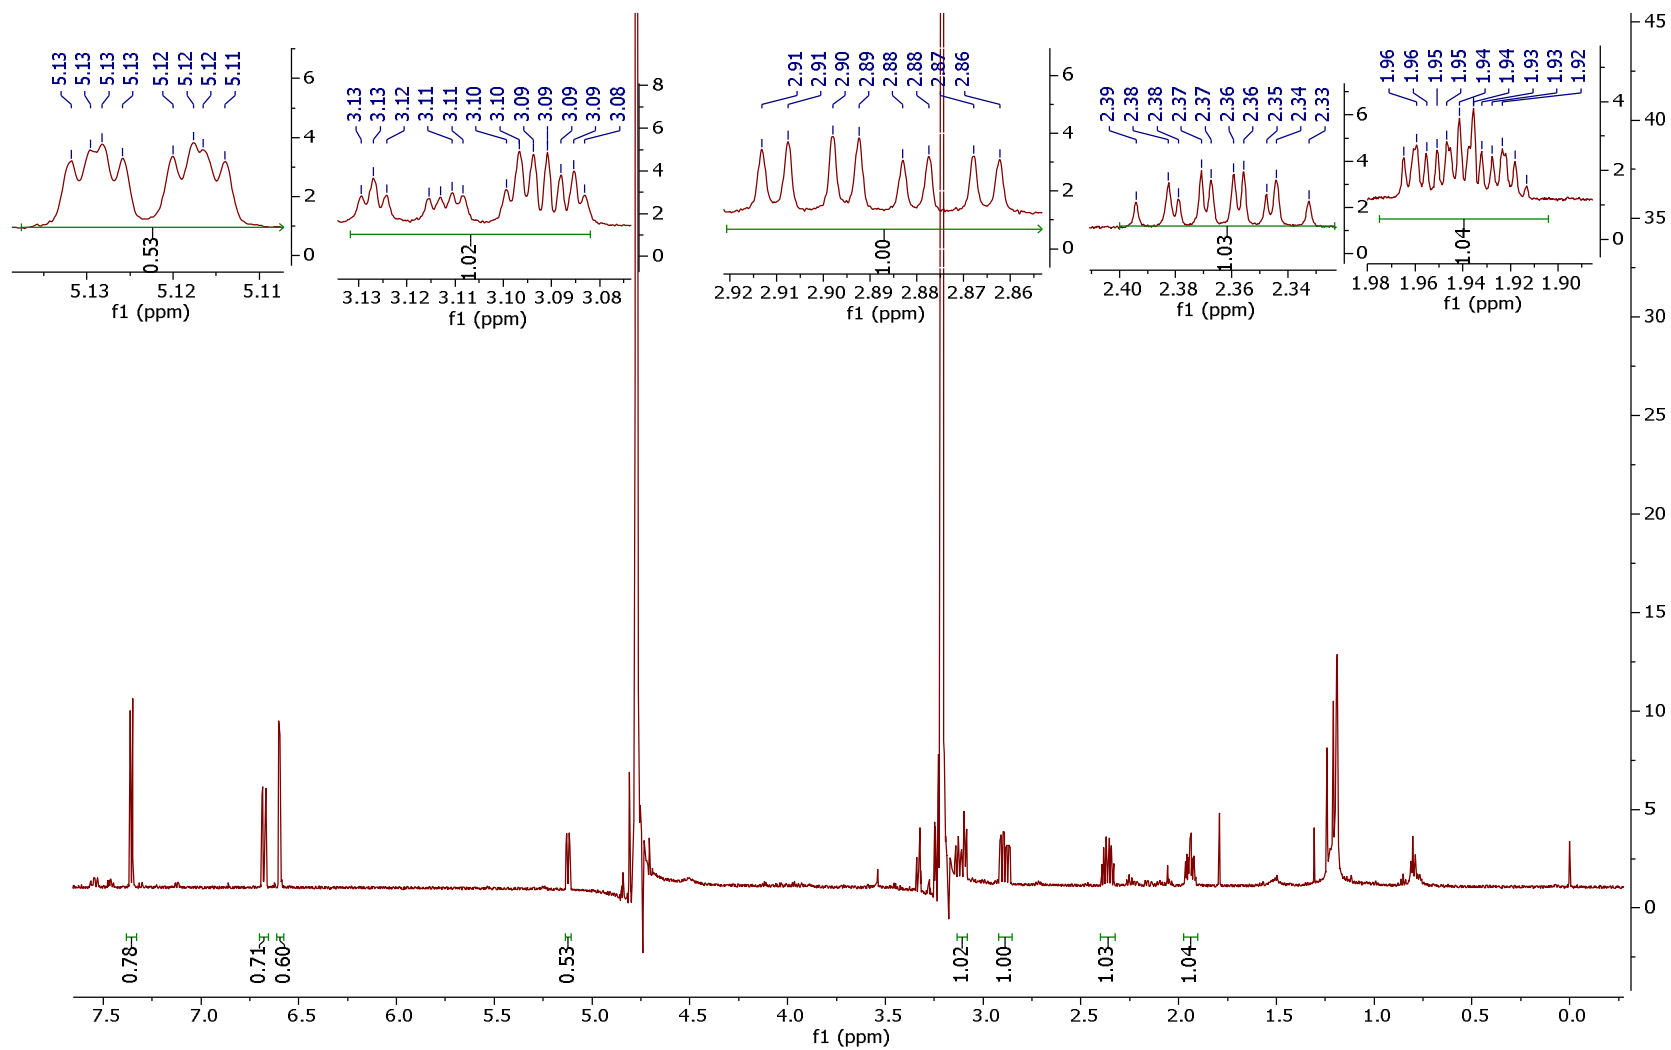

Figure S1:  $^1\text{H}$  NMR spectrum of compound C1 (600 MHz,  $\text{CD}_3\text{OD}$ )

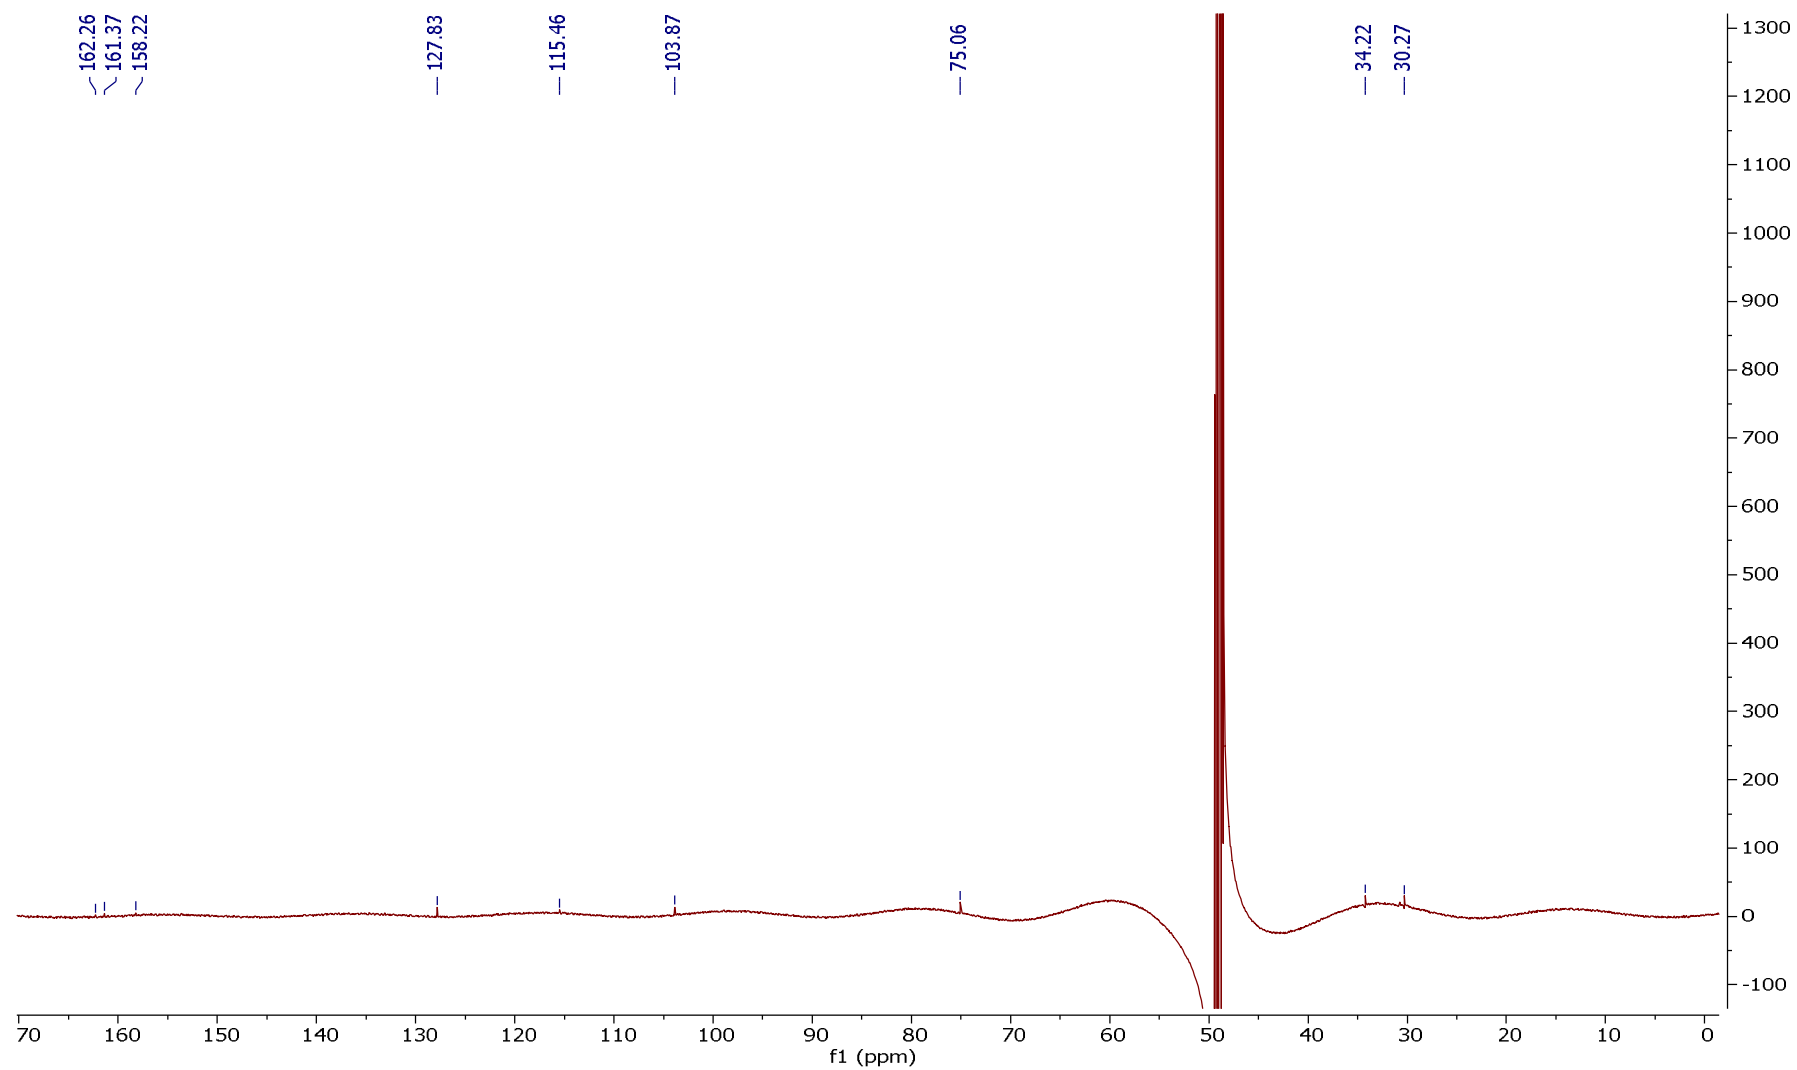

Figure S2: <sup>13</sup>C NMR spectrum of compound **C1** (150 MHz, CD<sub>3</sub>OD)

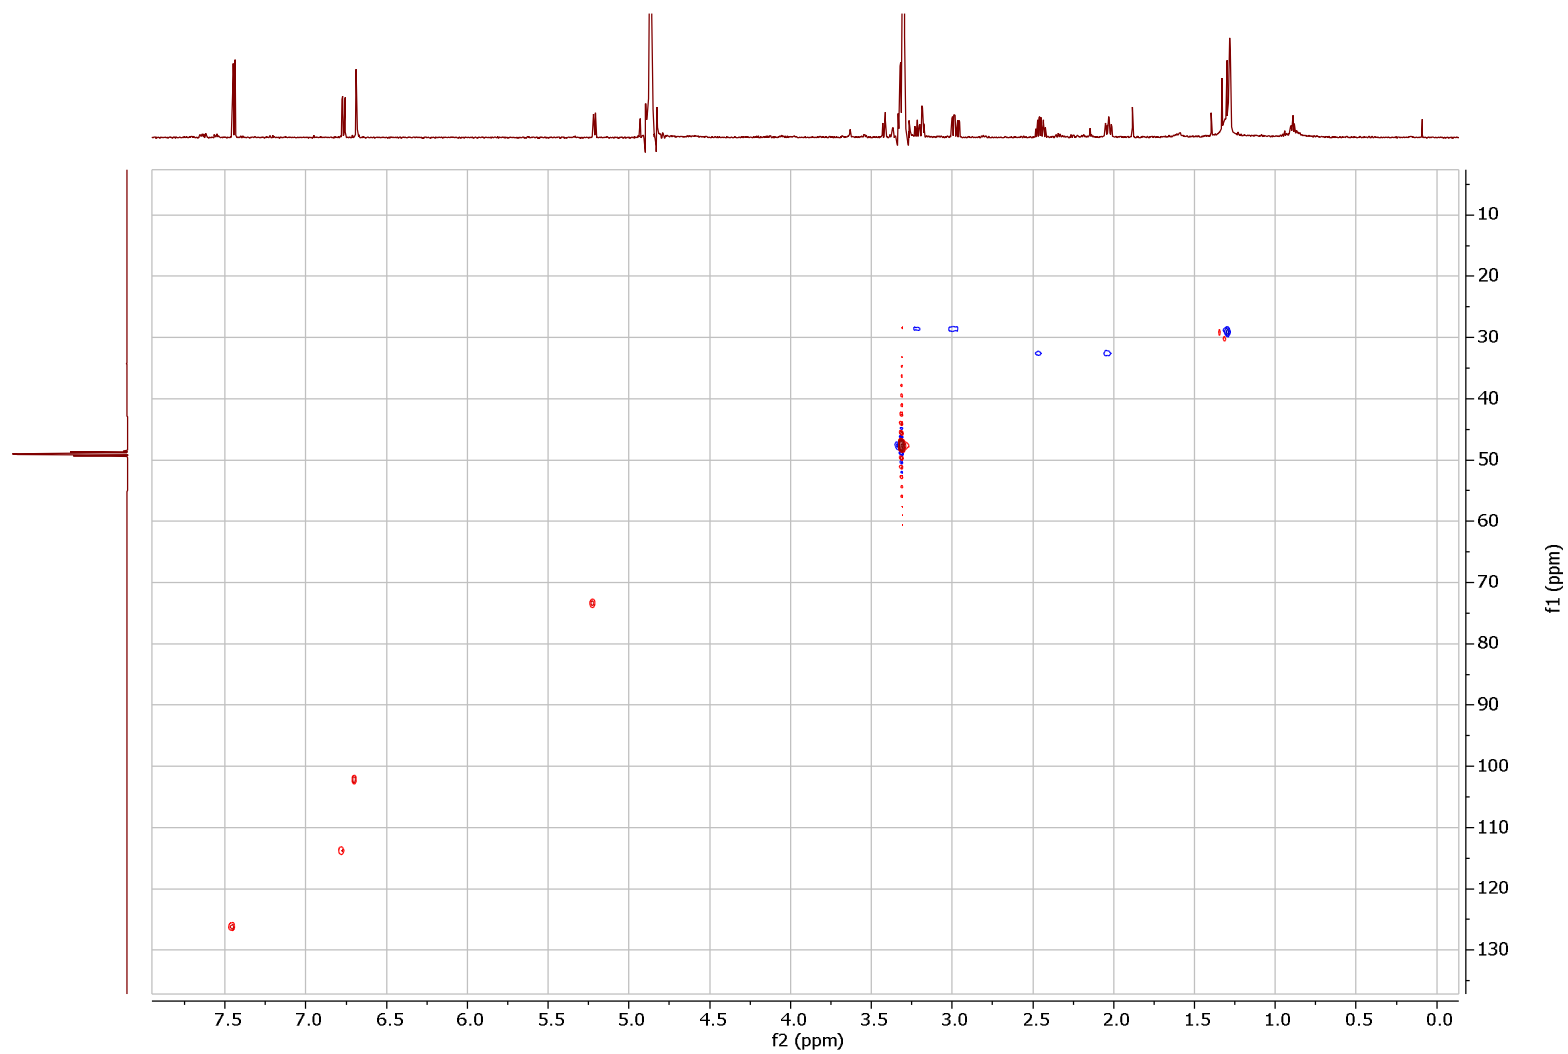

Figure S3:  $^1\text{H}$ - $^{13}\text{C}$  HSQC 2D NMR correlation spectroscopy of compound **C1** (600 MHz/150 MHz,  $\text{CD}_3\text{OD}$ )

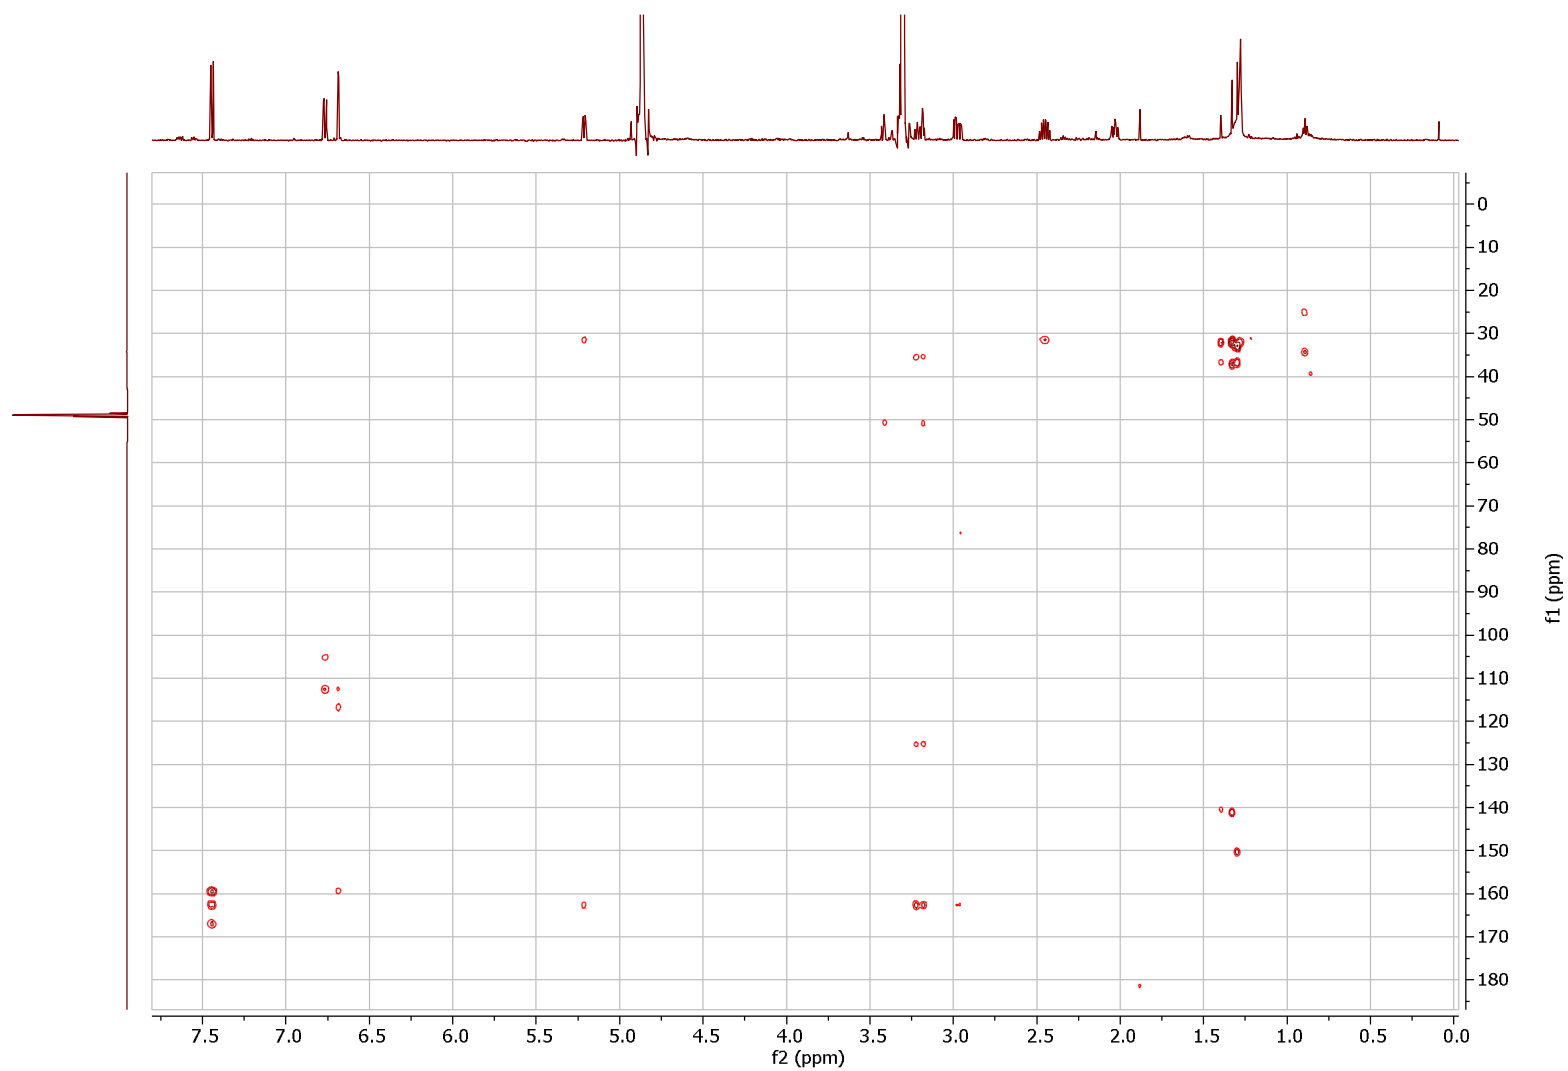

Figure S4:  $^1\text{H}$ - $^{13}\text{C}$  HMBC 2D NMR correlation spectroscopy of compound **C1** (600 MHz/150 MHz,  $\text{CD}_3\text{OD}$ )

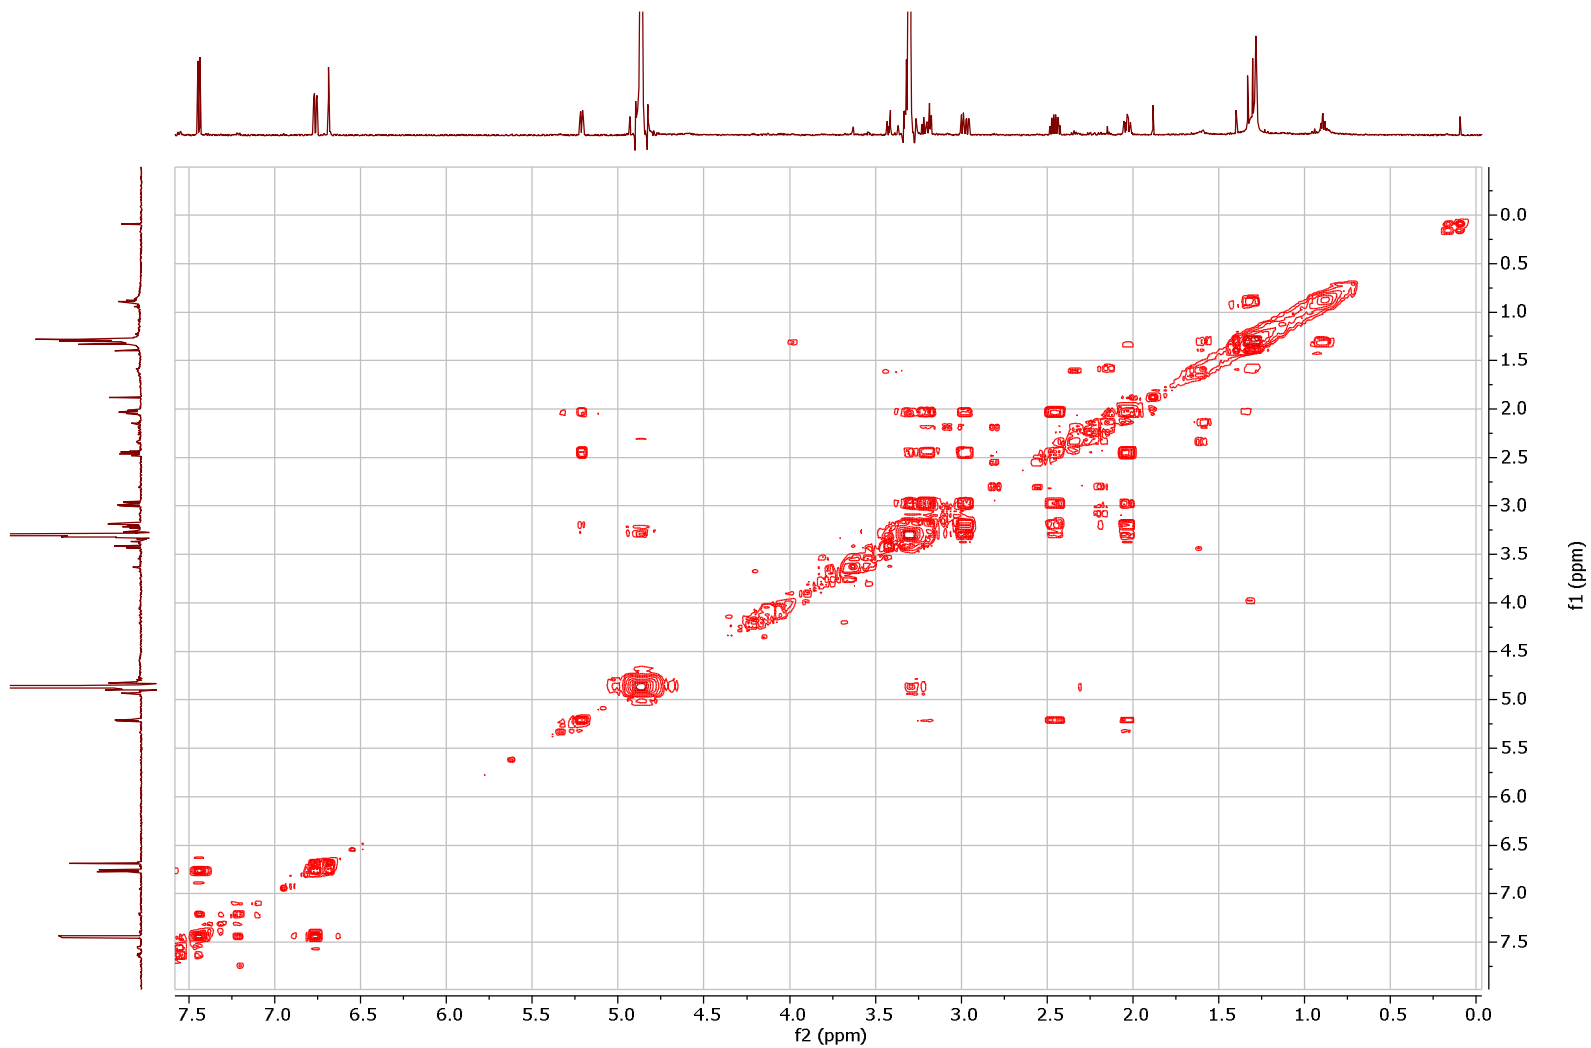

Figure S5:  $^1\text{H}$ - $^1\text{H}$  COSY 2D NMR correlation spectroscopy of compound **C1** (600 MHz,  $\text{CD}_3\text{OD}$ )

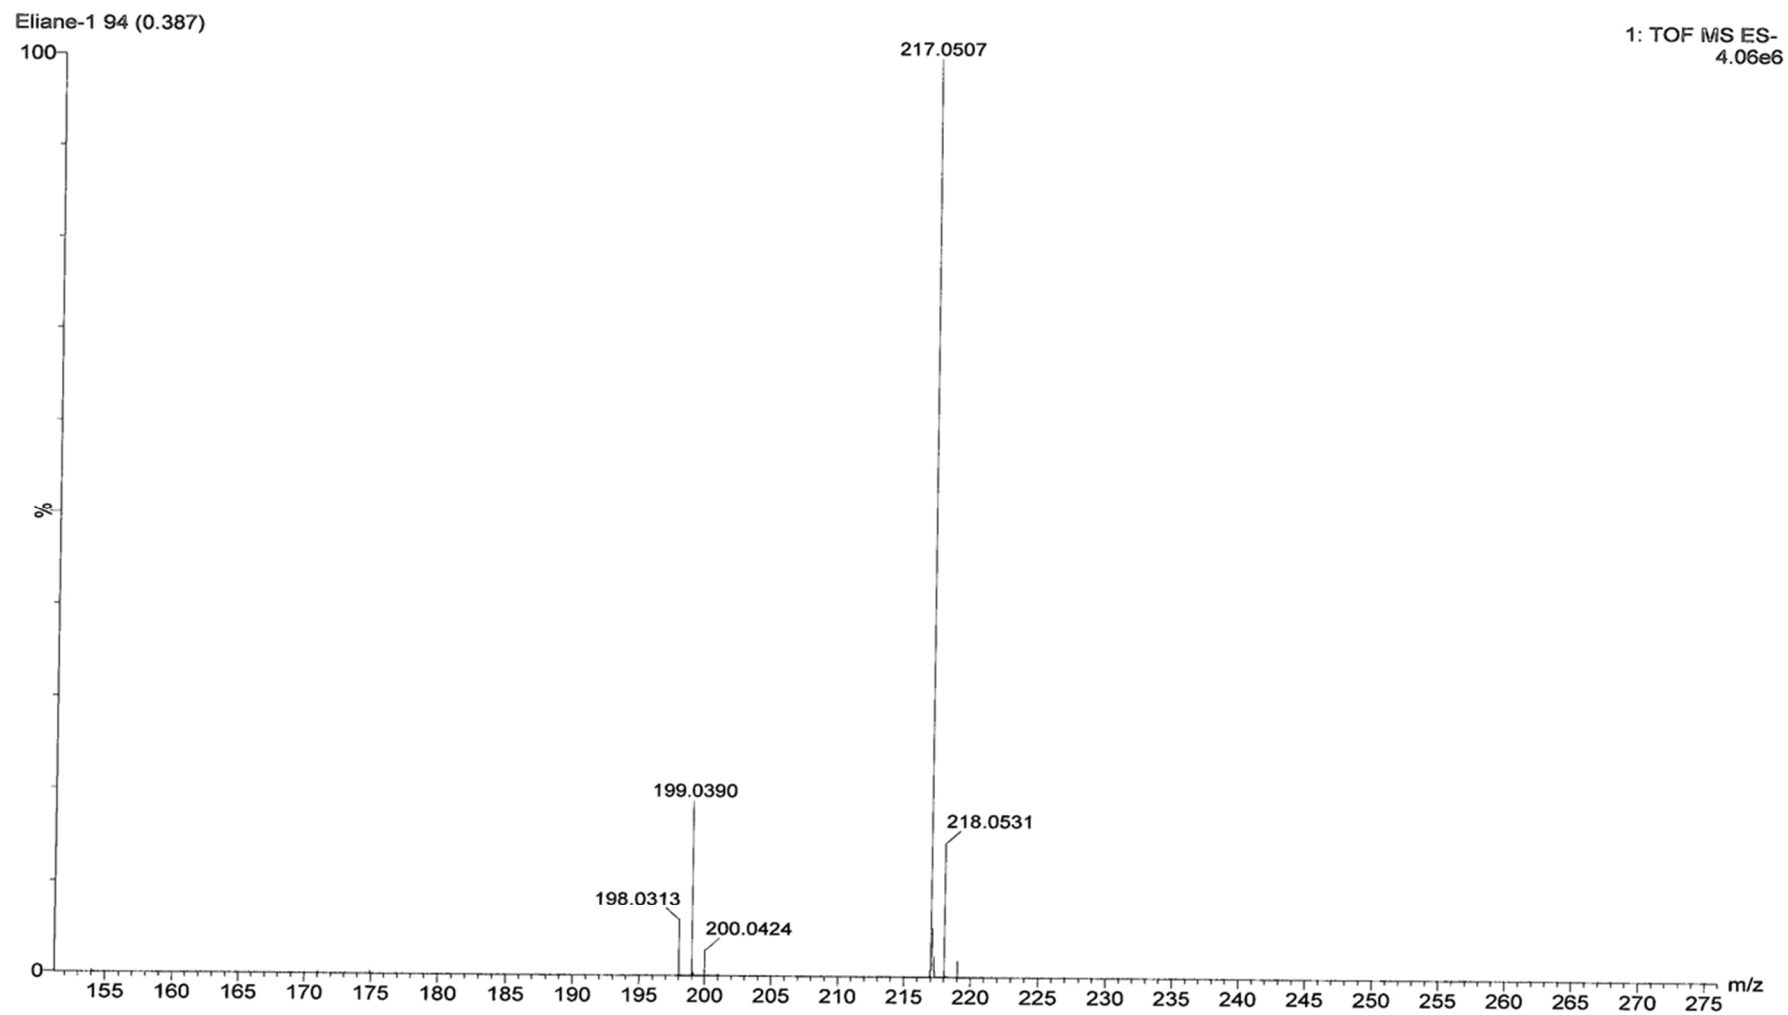

Figure S6: HRESIMS spectrum of compound **C1** (negative ion mode)

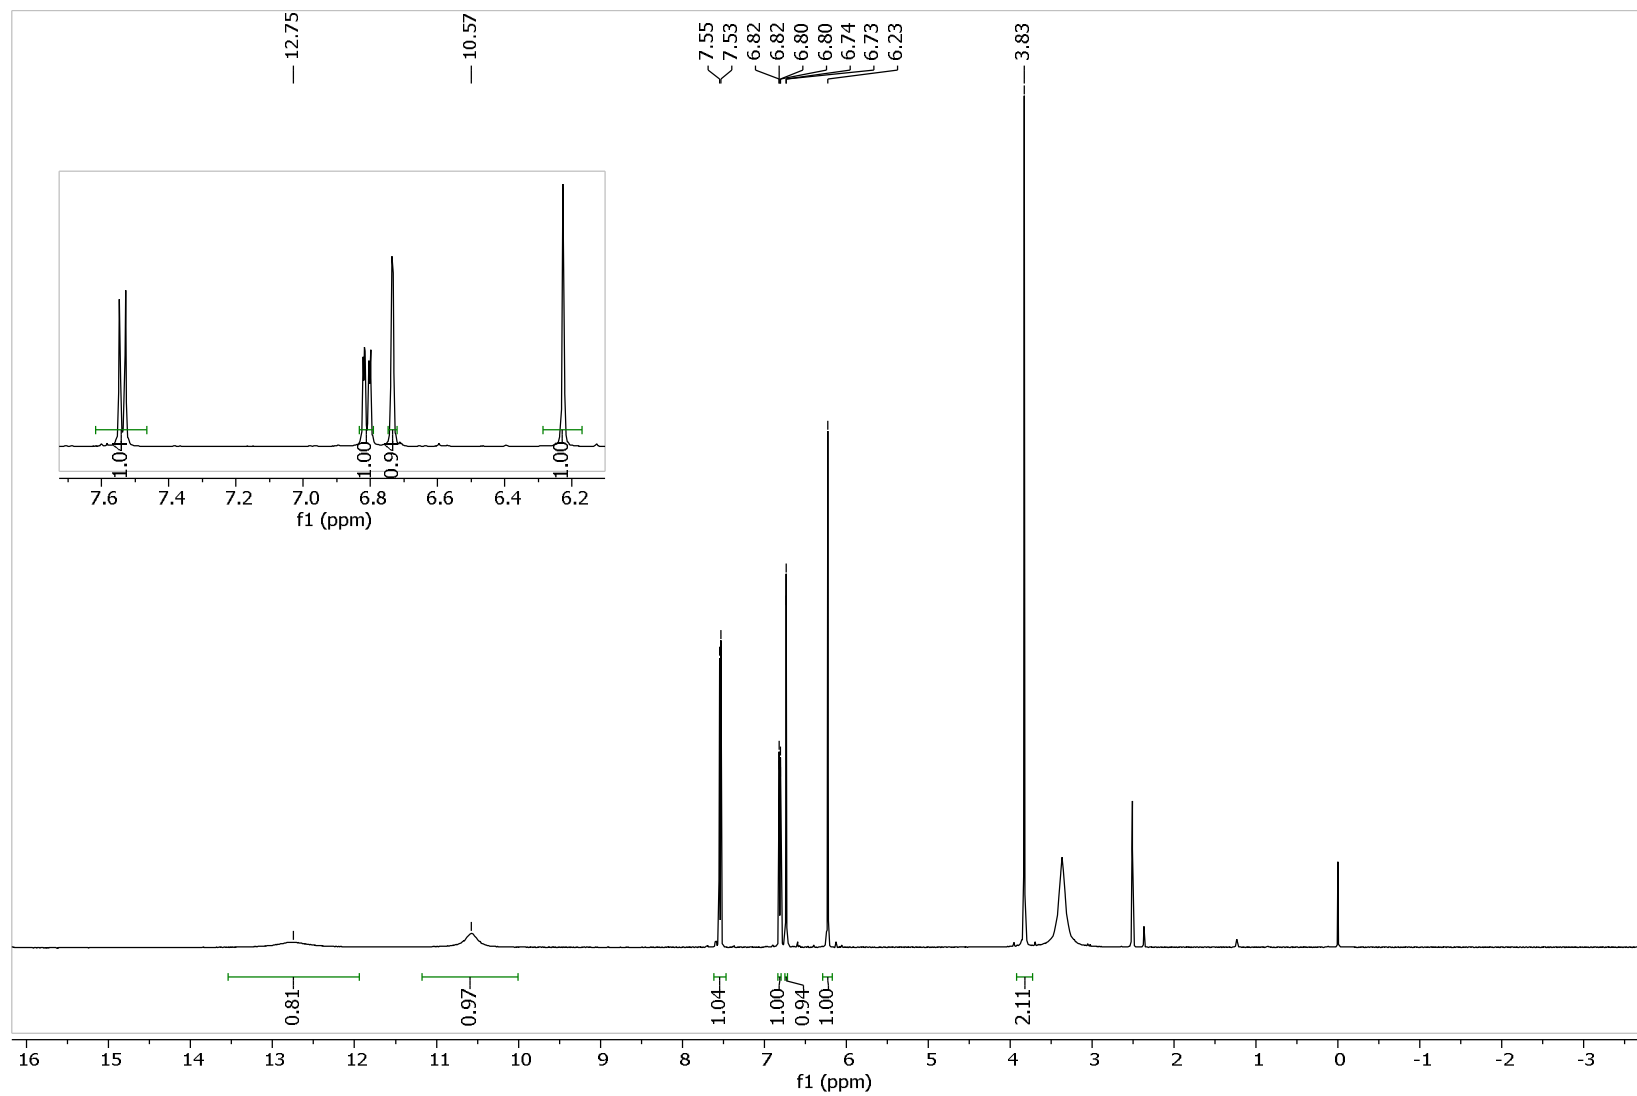

Figure S7: <sup>1</sup>H NMR spectrum of compound C2 (400 MHz, DMSO-d<sub>6</sub>)
